# Supplementary material for: Molecular phase engineering of organic semiconductors based on a [1]benzothieno[3,2-b][1]benzothiophene core
Source: Royal Society of Chemistry journal article supplement (doi:10.1039/c6ra22999a), 2016-01-01
Supplement: c6ra22999a1.pdf [file c6ra22999a1.pdf]

## Supporting Information

# Molecular Phase Engineering of Organic Semiconductors Based on [1]benzothieno[3,2-*b*][1]benzothiophene Core

Yaowu He,<sup>a</sup> Wenjun Xu,<sup>a</sup> Imran Murtaza,<sup>b, c</sup> Dongwei Zhang,<sup>a</sup> Chao He,<sup>a</sup> Yanan Zhu,<sup>a</sup> and Hong Meng\*<sup>a, b</sup>

<sup>a</sup> *School of Advanced Materials, Peking University Shenzhen Graduate School, Shenzhen, 518055, China*

<sup>b</sup> *Key Laboratory of Flexible Electronics (KLOFE) & Institute of Advanced Materials (IAM), Jiangsu National Synergetic Innovation Center for Advanced Materials (SICAM), Nanjing Tech University (Nanjing Tech), 30 South Puzhu Road, Nanjing 211816, China*

<sup>c</sup> *Department of Physics, International Islamic University, Islamabad 44000, Pakistan*

\*E-mail: menghong@pkusz.edu.cn

### Table of Contents

1. Table S1
2. Fig.s S1-8
3. <sup>1</sup>H NMR and <sup>13</sup>C NMR of compounds **6b**, Ph-BTBT and C6-Ph-BTBT
4. References

## 1. Table S1

**Table S1** Summary of the mobilities of a series of liquid crystalline compounds

|            | Structure |                                   | Mobility<br>[cm <sup>2</sup> V <sup>-1</sup> s <sup>-1</sup> ] | Reference |
|------------|-----------|-----------------------------------|----------------------------------------------------------------|-----------|
| DTAnt      |           | R = H                             | 0.063±0.006                                                    | 1         |
| DHTAnt     |           | R= C <sub>6</sub> H <sub>13</sub> | 0.50±0.045                                                     |           |
| 8-TP-BTBT  |           |                                   | 1.4±0.3                                                        | 2         |
| Ph-BTBT-10 |           |                                   | 14.7                                                           | 3         |
| C10-BTBT   |           |                                   | 3.0                                                            | 4, 5      |
| 8-TTP-8    |           |                                   | 0.2                                                            | 4-6       |
| 12ADT      |           |                                   | 0.68                                                           | 7         |

## 2. Fig. S1-8

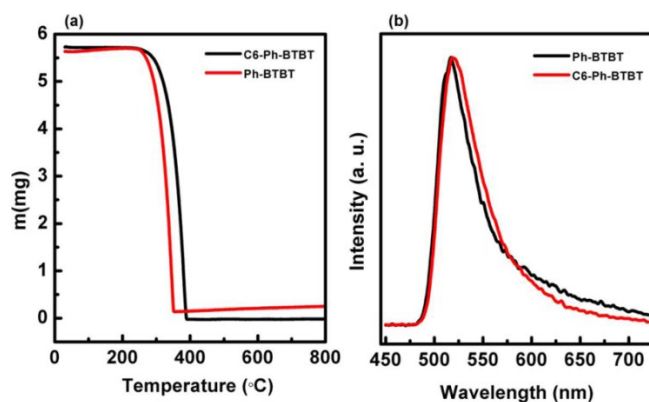

**Fig. S1** TGA of Ph-BTBT and C6-Ph-BTBT; (b) PL spectra of Ph-BTBT and C6-Ph-BTBT in CH<sub>2</sub>Cl<sub>2</sub>

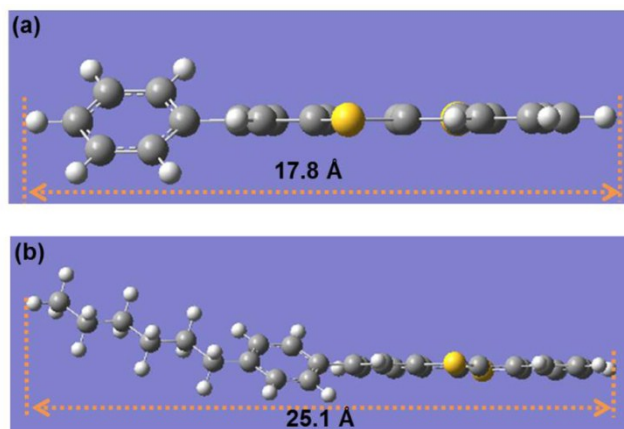

**Fig. S2** The molecular length of Ph-BTBT and C6-Ph-BTBT calculated by density functional theory (DFT) level using B3LYP with 6-31+G (d, p)

Theoretical calculation: The calculations of two molecules are carried out at density functional theory (DFT)<sup>[8]</sup> level using B3LYP<sup>[9]</sup> with 6-31 + G (d, p)<sup>[10]</sup> basis set for geometrical optimization and all the calculations are performed in Gaussian 09 package.<sup>[11]</sup> The length of molecules are obtained by Multiwfn 3.3.9.<sup>[12]</sup>

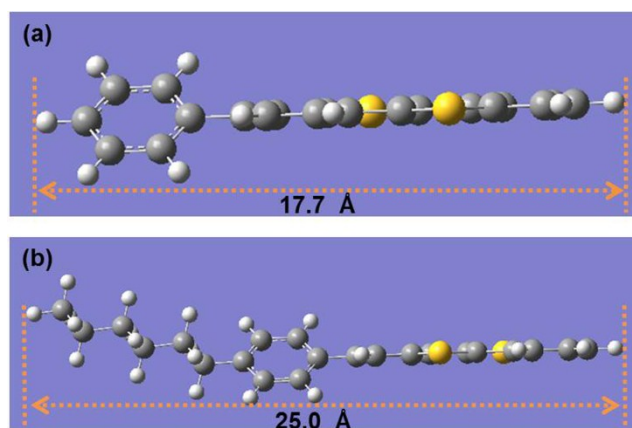

**Fig. S3** The molecular length of Ph-BTBT and C6-Ph-BTBT calculated by density functional theory (DFT) level using M06-2X with 6-311 + G (d, p)

Theoretical calculation: The calculations of two molecules are carried out at density functional theory (DFT)<sup>[8]</sup> level using M06-2X<sup>[13]</sup> with 6-311 + G (d, p)<sup>[14]</sup> basis set for geometrical optimization and all the calculations are performed in Gaussian 09 package.<sup>[11]</sup> The length of molecules are obtained by Multiwfn 3.3.9.<sup>[12]</sup>

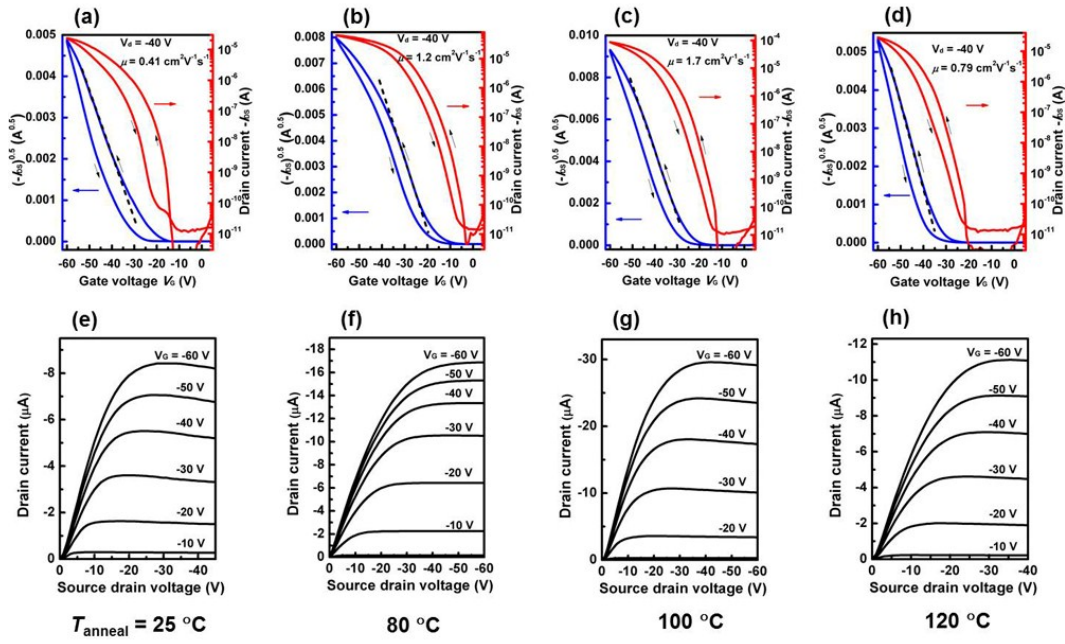

**Fig. S4** Transfer and output curves of OTFTs of C6-Ph-BTBT films grown on an OTS-coated substrate at  $T_{\text{sub}} = 25$  °C. Then the devices thermally annealed at 25 °C (a, e), 80 °C (b, f), 100 °C (c, g) and 120 °C (d, h). (a), (b), (c) and (d)  $I_{DS} - V_G$  characteristics Curves; (e), (f), (g) and (h)  $I_{DS} - V_{DS}$  characteristics curves

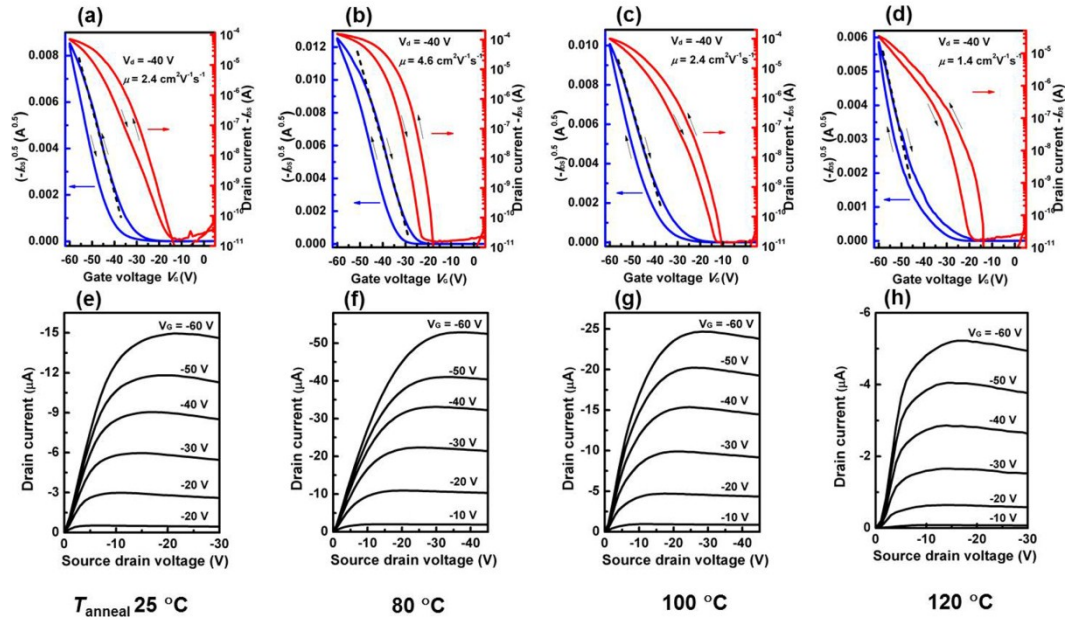

**Fig. S5** Transfer and output curves of OTFTs of C6-Ph-BTBT films grown on an OTS-coated substrate at  $T_{\text{sub}} = 100$  °C. Then the devices thermally annealed at 25 °C (a, e), 80 °C (b, f), 100 °C (c, g) and 120 °C (d, h); (a), (b), (c) and (d)  $I_{DS} - V_G$  characteristics Curves; (e), (f), (g) and (h)  $I_{DS} - V_{DS}$  characteristics curves

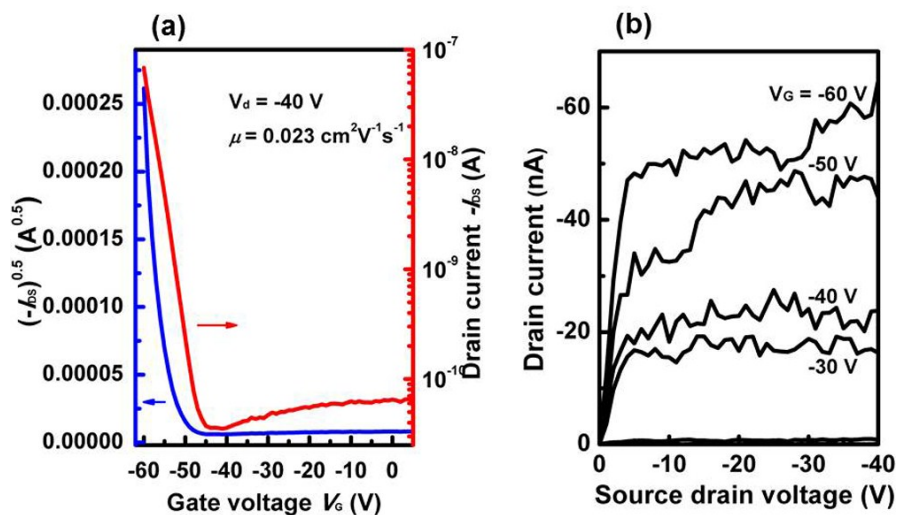

**Fig. S6** Device performance of Ph-BTBT-based OTFTs substrate at  $T_{\text{sub}} = 25\text{ }^{\circ}\text{C}$ . (a) transfer characteristics ( $I_D$  versus  $V_{GS}$ ), (b) Output characteristics ( $I_D$  versus  $V_{DS}$ )

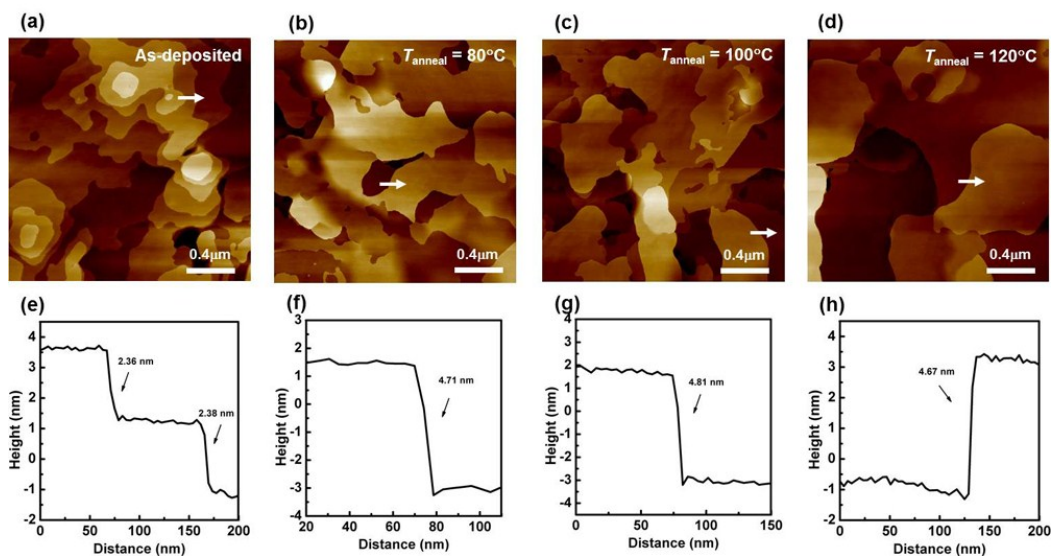

**Fig. S7** AFM of polycrystalline C6-Ph-BTBT thin films (a) as-deposited, annealed at 80 °C (b), 100 °C (c) and 120 °C for 10 minutes. And (e), (f), (g) and (i) cross-sectional profiles of the samples in Figs 2 a, b, c and d respectively. Scanning position and direction are also indicated in Fig. a, b, c and f.

Figs S7a, S7b, S7c and S7d show the AFM images of the as-deposited sample and after the films were annealed at 80 °C, 100 °C and 120 °C for 10 min, respectively. The surface of the thin films as deposited presents the morphology of layered crystallinity as terraced mounds, as shown in Fig. S7a. Each step height of terraces was measured to be approximately 2.37 nm (Fig. S7e). The annealed temperatures influence the morphology of thin films of C6-Ph-BTBT. Figs S7b-d shows the

AFM images of the thin films of C6-Ph-BTBT after annealing at 80, 100 and 120 °C, respectively. The domain size of thin films based on C6-Ph-BTBT becomes progressively larger with increasing annealing temperatures. The step height after annealing increases from ~2.35 nm to ~4.7 nm, as seen in Fig. S7f-h. This observation suggests a bilayer structure formation. We can predict that the characteristics of the OTFTs after annealing will reach a higher performance due to the uniformity of the thin-film. However, many cracks can be observed in the thin films after annealing at 120 °C. The results are consistent with OTFTs performance. (The OTFT mobility was decreased after annealing at 120 °C).

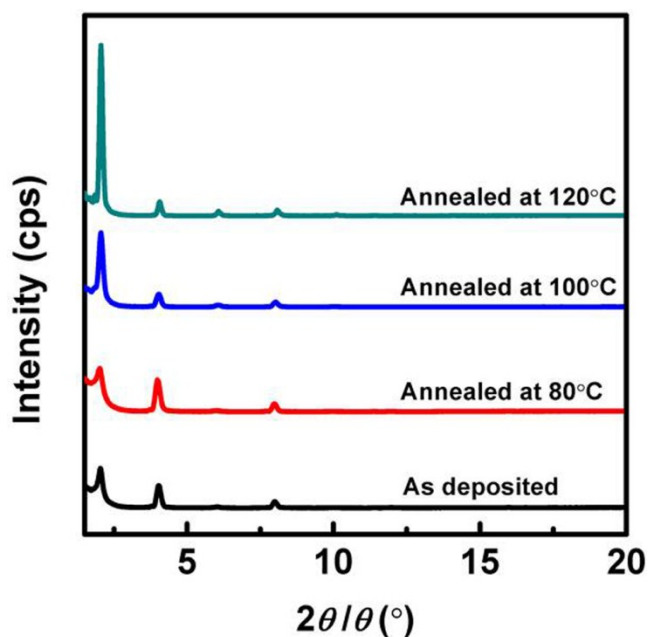

**Fig. S8** XRD results for polycrystalline C6-Ph-BTBT thin films with or without annealing (80, 100 and 120 °C).

**Fig. S8** shows the XRD pattern of the thin film based on C6-Ph-BTBT annealed at various temperatures. The XRD patterns of C6-Ph-BTBT show higher order reflections with the increase of annealed temperature, indicating a better ordering in films grown at higher substrate temperatures. The results are consistent with AFM morphology.

### 3. $^1\text{H}$ NMR and $^{13}\text{C}$ NMR of compounds 7b, Ph-BTBT and C6-Ph-BTBT

hyw-20150330-hyw-6C  
 hyw-20150330-hyw-6C  
 300M Bruker  
 Solvent: DMSO-d6

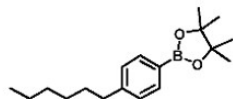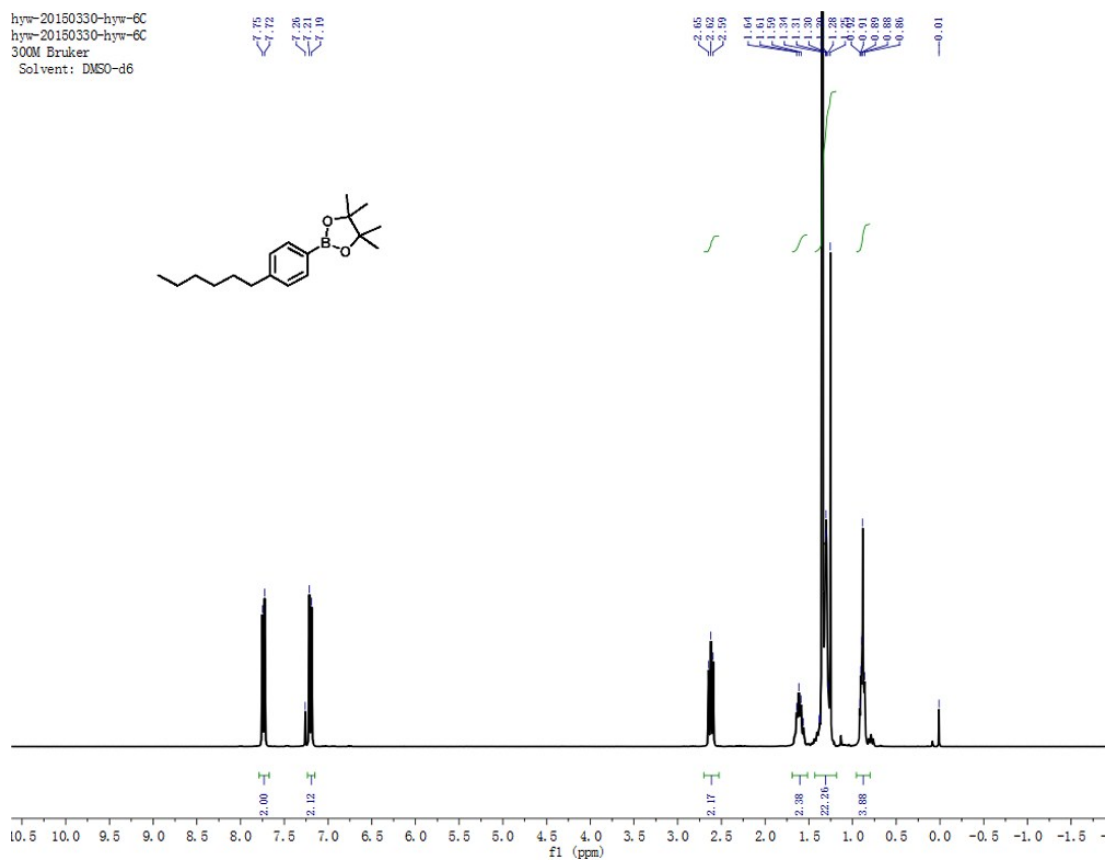

hyw-20150330-hyw-6C  
 hyw-20150330-hyw-6C  
 Bruker 300 M CDC13

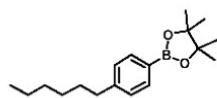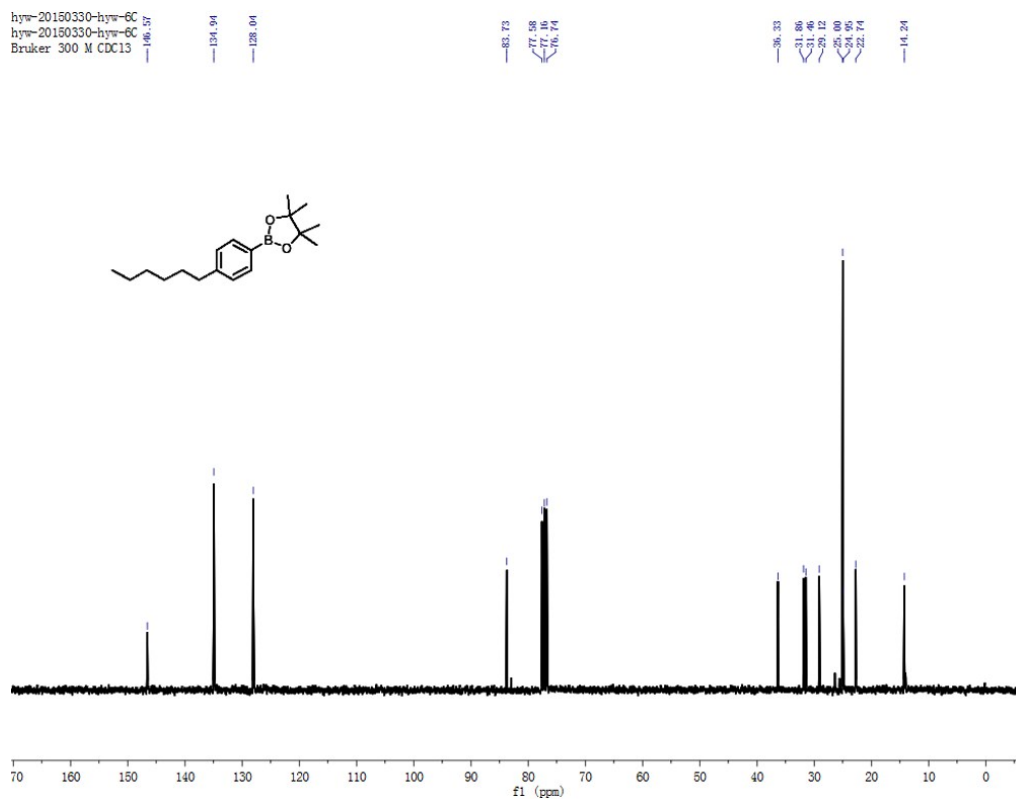

heyaoru-20150526-H1V-074-61-01-400  
heyaoru-20150526-H1V-074-61-01-400

-1.51

-0.01

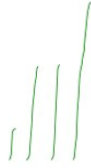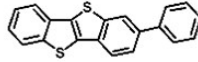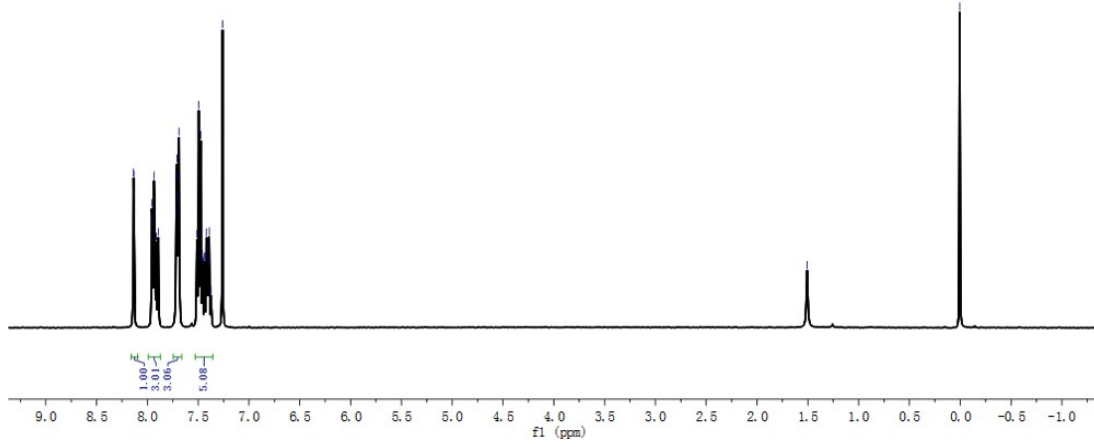

heyaoru-20150526-H1V-074-61-01-400  
heyaoru-20150526-H1V-074-61-01-400

77.48  
77.16  
76.84

-0.15

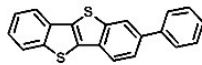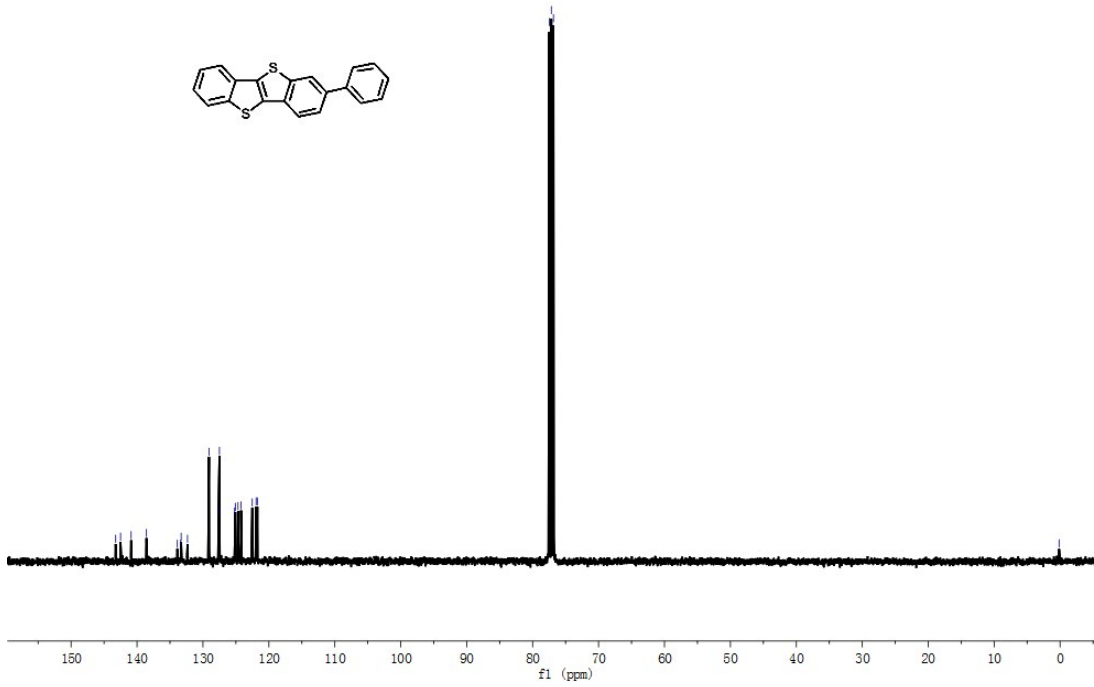





#### 4. References

1. H., Meng, F. Sun, M. B. Goldfinger, G. D. Jaycox, Z. Li, W. J. Marshall and G. S. Blackman, *J. Am. Chem. Soc.* **2005**, *127*(8), 2406-2407.
2. H. Iino, T. Kobori and J. I. Hanna, *J. Non-Cryst. Solids*, **2012**, *358*(17), 2516-2519.
3. H. Iino, T. Usui and J. Hanna, *Nat. Commun.* **2015**, *6*, 6828.
4. H. Iino and J. Hanna, *Adv. Mater.* **2011**, *23*(15), 1748-1751.
5. H. Iino and J.-i. Hanna, *J. Appl. Phys.* **2011**, *109*(7), 074505.
6. H. Iino and J.-I. Hanna, *Mol. Cryst. Liq. Cryst.* **2011**, *542*(1), 237-243.
7. W.-L. Liao, T.-H. Lee, J.-T. Chen and C.-S. Hsu, *J. Mater. Chem. C*, **2016**, *4*(12), 2284-2288.
8. P. Hohenberg and W. Kohn, *Phys. Rev.*, **1964**, *136*(3B), B864-B871. b) W. Kohn and L. J. Sham, *Phys. Rev.*, **1965**, *140*(4A) A1133-A1138. c) R. G. Parr and W. Yang, *Density-functional theory of atoms and molecules*, Oxford Univ. Press, Oxford, 1989. d) D. R. Salahub and M. C. Zerner, Ed. *The Challenge of d and f Electrons*, ACS, Washington, D.C., 1989.
9. A. D. Becke, *J. Chem. Phys.* **1993**, *98*(7), 5648-5652
10. a) G. A. Petersson, A. Bennett, T. G. Tensfeldt, M. A. Al-Laham, W. A. Shirley, and J. Mantzaris, *J. Chem. Phys.* **1988**, *89*(4): 2193-2218. b) G. A. Petersson and M. A. Al-Laham, *J. Chem. Phys.*, **1991**, *94*(9), 6081-6090.
11. E. Frisc, M. J. Frisch, F. R. Clemente and G. W. Trucks, Gaussian 09, Revision D. 01, Gaussian, Inc., Wallingford CT. **2013**
12. T. Lu and F. Chen, *J. Comp. Chem.* **2012**, *33*(5), 580-592.
13. 13Y. Zhao and D. G. Truhlar, *J. Phys. Chem. A*, **2006**, *110*(15), 5121-5129.
14. K. Raghavachari and G. W. Trucks, *Chem. Phys.*, 1989, *91*(2), 1062-1065.
